# Supplementary material for: Extra Virgin Olive Oil Extracts of Indigenous Southern Tuscany Cultivar Act as Anti-Inflammatory and Vasorelaxant Nutraceuticals
Source: MDPI journal article supplement (doi:10.3390/antiox11030437), 2022-02-22

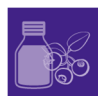

## Supplementary Material for:

# Extra Virgin Olive Oil Extracts of Indigenous Southern Tuscany Cultivar Act as Anti-inflammatory and Vasorelaxant Nutraceuticals

Luca Pozzetti <sup>1</sup>, Francesca Ferrara <sup>2</sup>, Ludovica Marotta <sup>1</sup>, Sandra Gemma <sup>1</sup>, Stefania Butini <sup>1</sup>, Mascia Benedusi <sup>2</sup>, Fabio Fusi <sup>1</sup>, Amer Ahmed <sup>3</sup>, Serena Pomponi <sup>4</sup>, Stefano Ferrari <sup>5</sup>, Matteo Perini <sup>6</sup>, Anna Ramunno <sup>7</sup>, Giacomo Pepe <sup>7</sup>, Pietro Campiglia <sup>7</sup>, Giuseppe Valacchi <sup>8,9,10</sup>, Gabriele Carullo <sup>1,\*</sup> and Giuseppe Campiani <sup>1,\*</sup>

### Contents

**Table S1.** Primer Sequences

**Figure S1.** Representative <sup>1</sup>H-NMR spectrum of OE\_15

**Figure S2.** OE\_05  $\lambda$ :280 nm

**Figure S3.** OE\_10  $\lambda$ :280 nm

**Figure S4.** OE\_15  $\lambda$ :280 nm

**Table S2.** Method validation parameters for quantitation by RP-UHPLC-PDA of flavones in olive oil extracts

**Table S1.** Primer sequences

| Gene           | Forward sequence         | Reverse sequence         |
|----------------|--------------------------|--------------------------|
| GPx1           | CAACCAGTTTGGGCATCAG      | TCTCGAAGAGCATGAAGTTGG    |
| NQO1           | CTGATCGTACTGGCTCACTC     | AACAGACTCGGCAGGATAC      |
| IL-6           | TAGGACTGGAGATGTCTGAGGCT  | GACCGAAGGCGCTTGTGGA      |
| COX-2          | TTCAAATGAGATTGTGGGAAAATT | ATATCATCTCTGCCTGAGTATCTT |
| $\beta$ -actin | ATTGCCGACAGGATGCAGA      | AGTACTTGCGCTCAGGAGGA     |

**Figure S1. Representative  $^1\text{H}$ -NMR spectrum of OE\_15**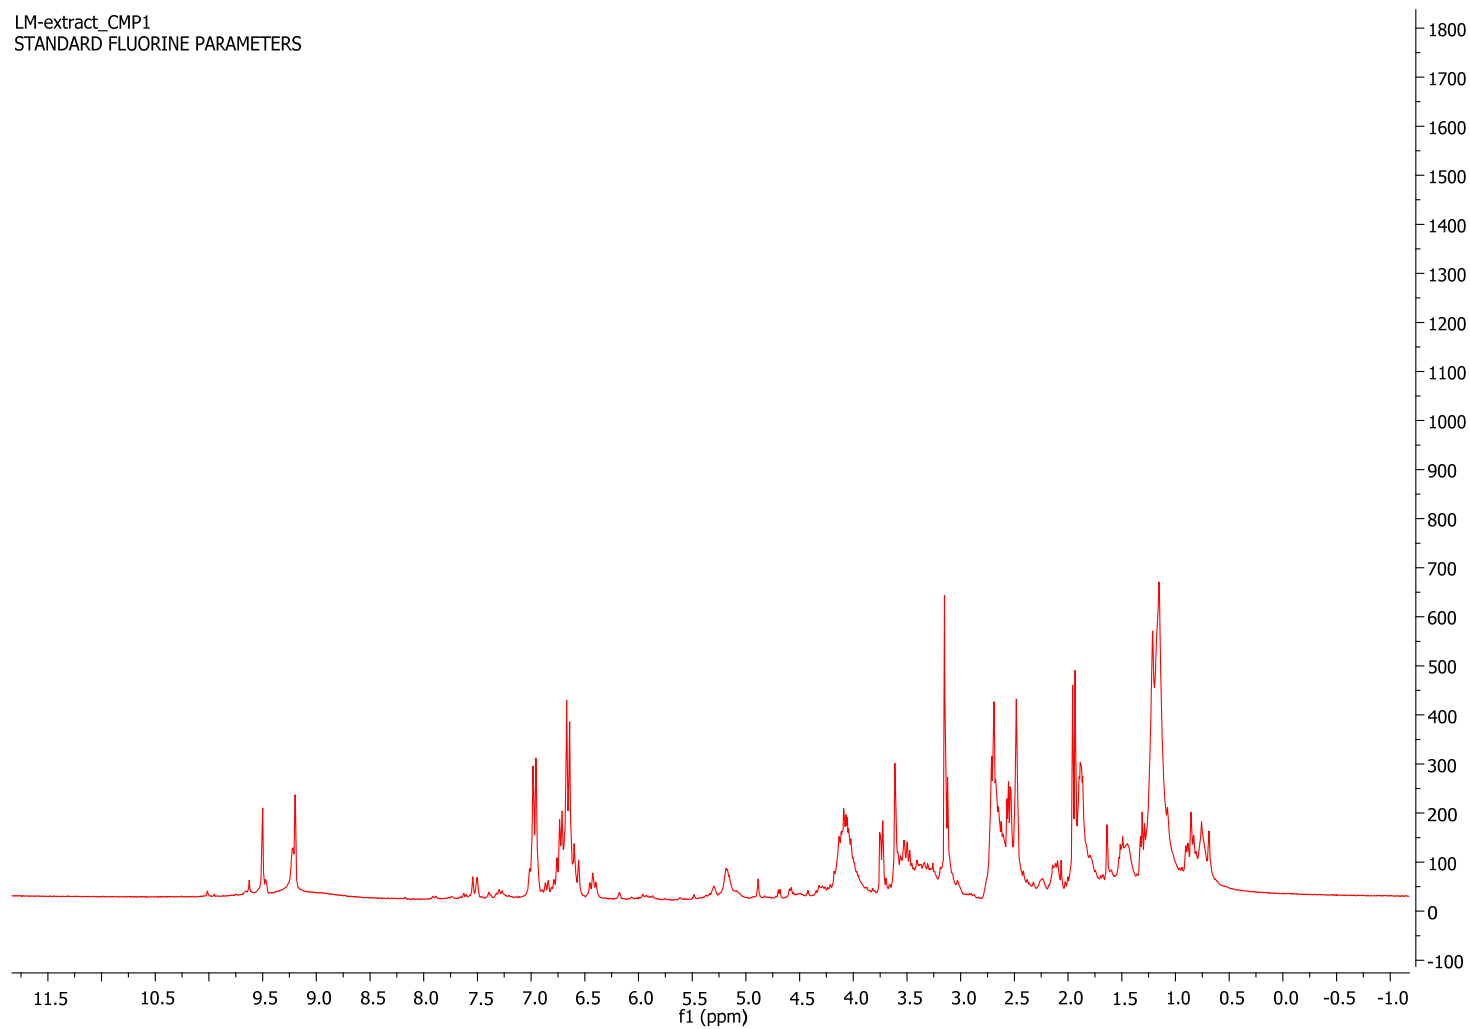

Figure S2. OE\_05  $\lambda$ :280 nm

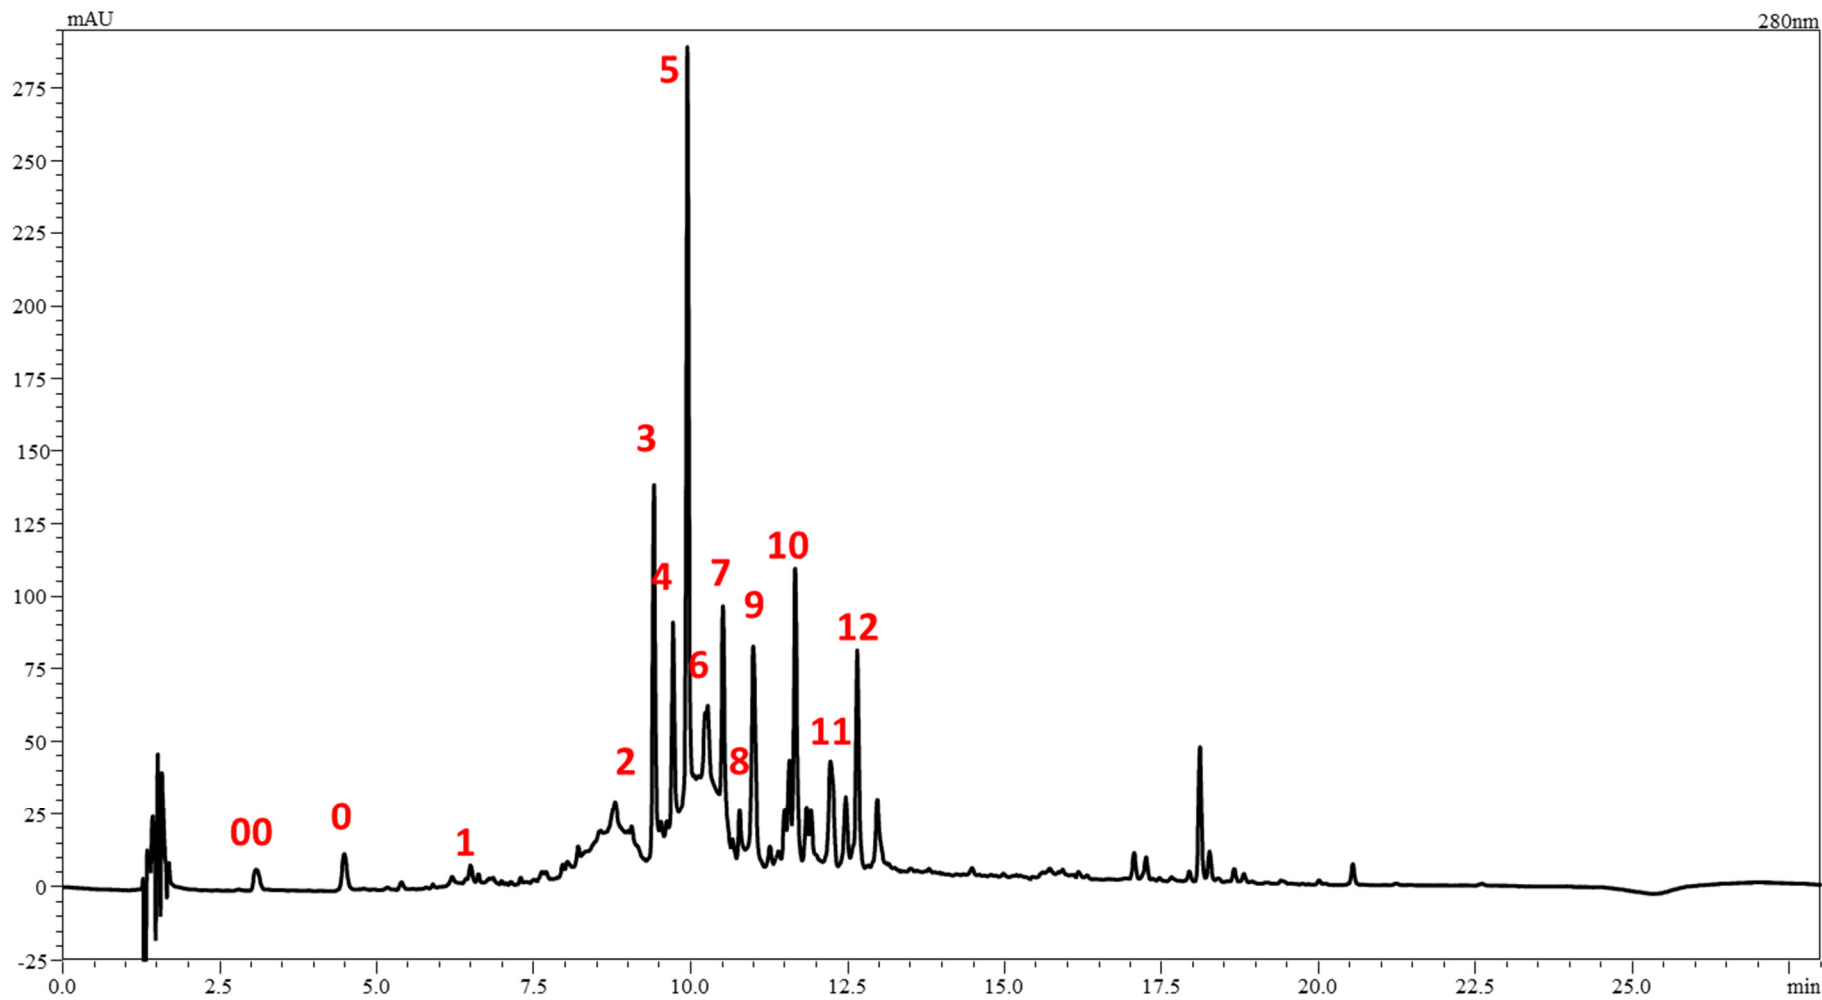

Figure S3. OE\_10  $\lambda$ :280 nm

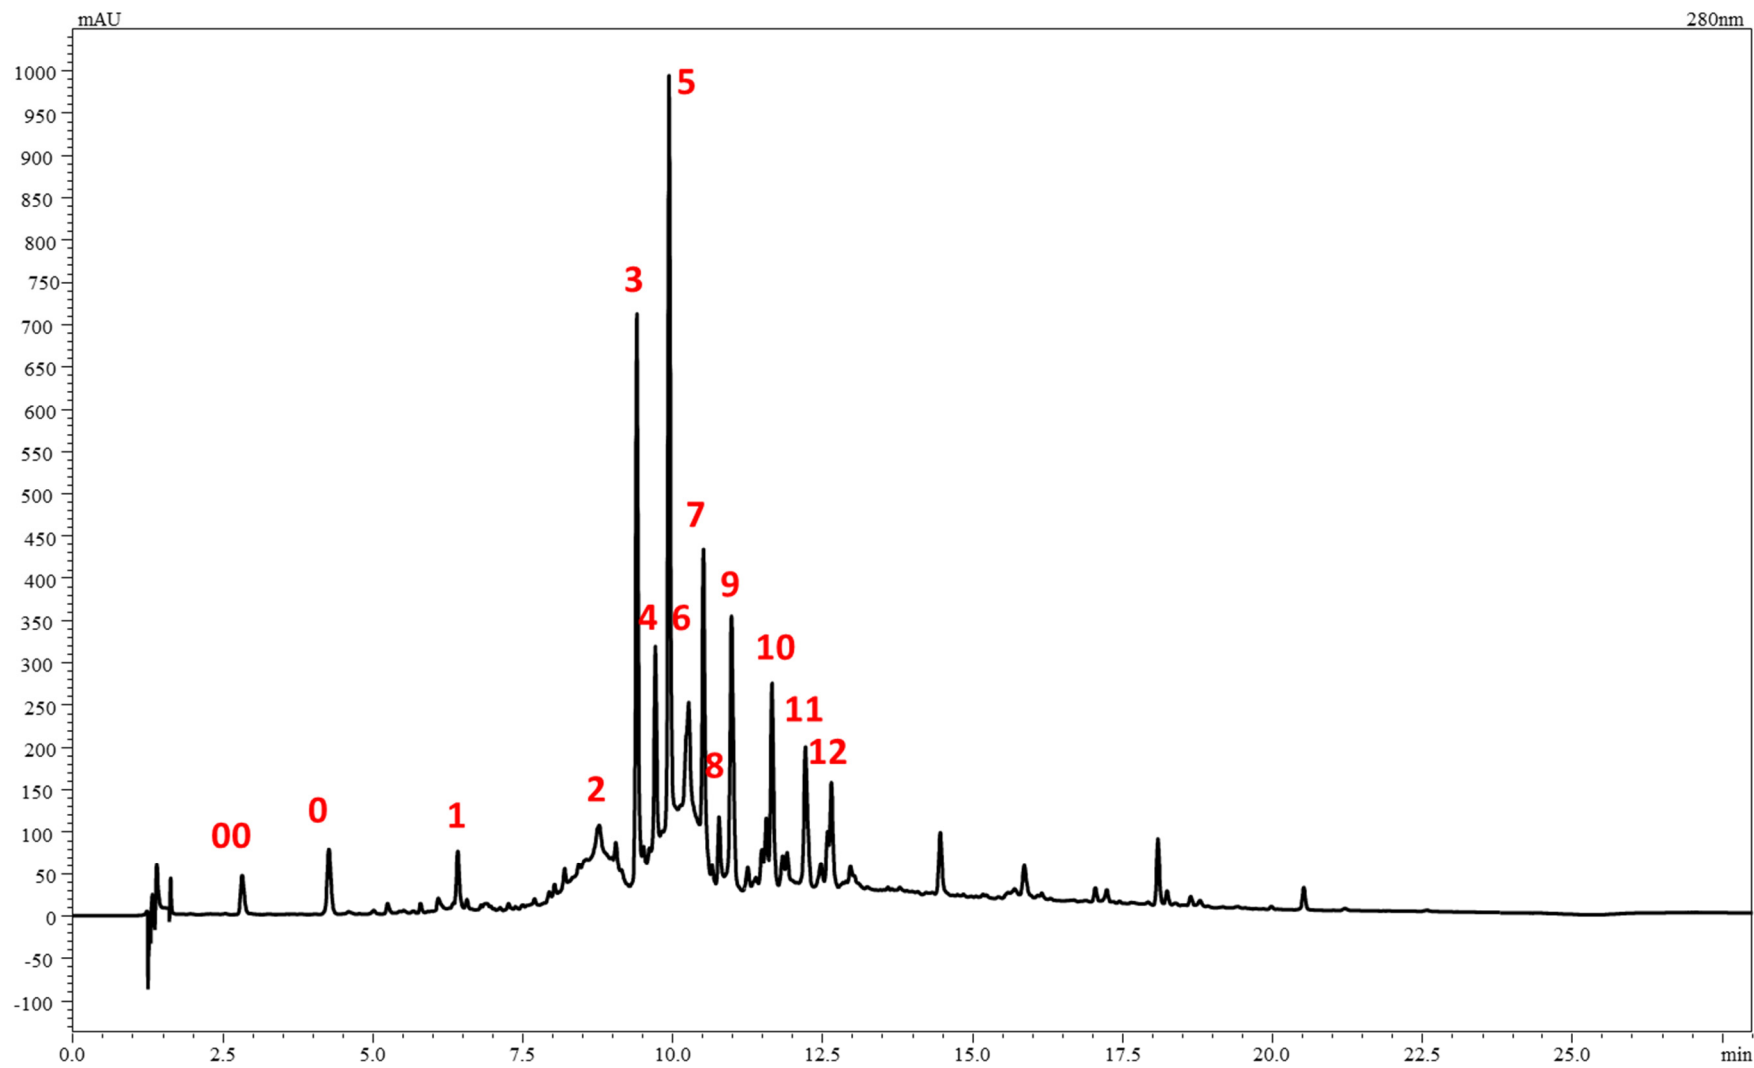

Figure S4. OE\_15  $\lambda$ :280 nm

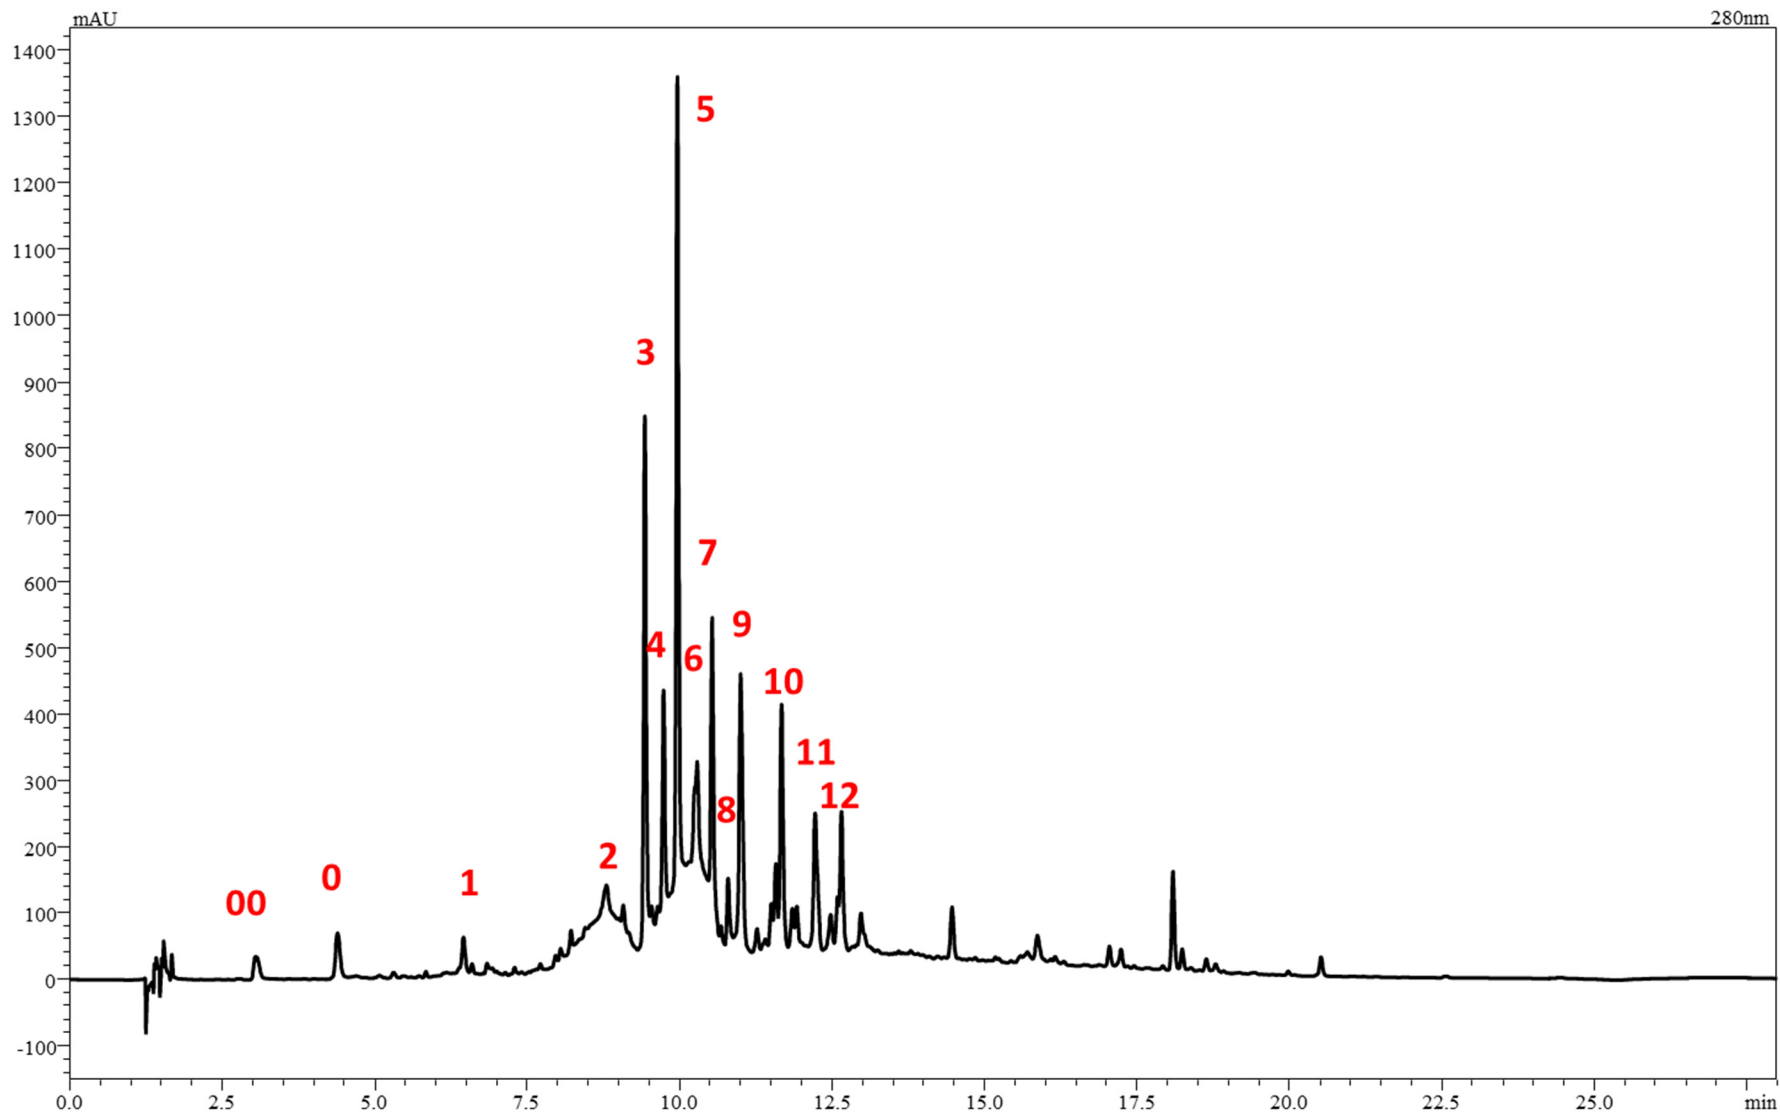

**Table S2.** Method validation parameters for quantitation by RP-UHPLC-PDA of flavones in olive oil extracts

| Parameters                                                                                                                                                                                                                                       |                            | Luteolin                   |              | Apigenin                   |              |
|--------------------------------------------------------------------------------------------------------------------------------------------------------------------------------------------------------------------------------------------------|----------------------------|----------------------------|--------------|----------------------------|--------------|
| Retention time (min) ( <i>n</i> = 4)                                                                                                                                                                                                             |                            | 9.41 ± 0.01                |              | 10.51 ± 0.01               |              |
| Regression equation                                                                                                                                                                                                                              |                            | $y = 0.000036x + 0.059537$ |              | $y = 0.000029x - 0.159557$ |              |
| Correlation coefficient ( <i>R</i> <sup>2</sup> )                                                                                                                                                                                                |                            | ≥ 0.9999                   |              | ≥ 0.9999                   |              |
| LOD (μM)                                                                                                                                                                                                                                         |                            | 0.06                       |              | 0.01                       |              |
| LOQ (μM)                                                                                                                                                                                                                                         |                            | 0.17                       |              | 0.04                       |              |
|                                                                                                                                                                                                                                                  | Analyte concentration (μM) | RSD (%)                    | Accuracy (%) | RSD (%)                    | Accuracy (%) |
| Intraday<br>( <i>n</i> = 3)                                                                                                                                                                                                                      | 10                         | 0.2%                       | 99.7%        | 0.1%                       | 102.1%       |
|                                                                                                                                                                                                                                                  | 20                         | 0.4%                       | 98.7%        | 0.1%                       | 100.9%       |
|                                                                                                                                                                                                                                                  | 50                         | 0.2%                       | 98.7%        | 0.1%                       | 101.7%       |
| Interday<br>( <i>n</i> = 3)                                                                                                                                                                                                                      | 10                         | 0.4%                       | 98.8%        | 0.2%                       | 100.9%       |
|                                                                                                                                                                                                                                                  | 20                         | 0.1%                       | 98.9%        | 0.1%                       | 101.4%       |
|                                                                                                                                                                                                                                                  | 50                         | 0.2%                       | 98.8%        | 0.1%                       | 102.5%       |
| <p><i>Y</i>: concentration of tested compounds; <i>X</i>: peak area at 330 nm</p> <p>LOQ: 10 × standard deviation of the response/slope of calibration curve</p> <p>LOD: 3.3 × standard deviation of the response/slope of calibration curve</p> |                            |                            |              |                            |              |

| Extract | Luteolin<br>(mg/g) | Apigenin<br>(mg/g) |
|---------|--------------------|--------------------|
| OE_05   | $0.53 \pm 0.01$    | $0.24 \pm 0.01$    |
| OE_10   | $0.42 \pm 0.01$    | $0.17 \pm 0.01$    |
| OE_15   | $1.99 \pm 0.06$    | $0.82 \pm 0.03$    |

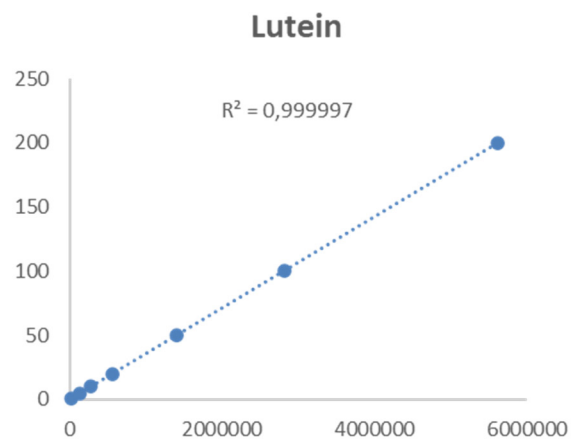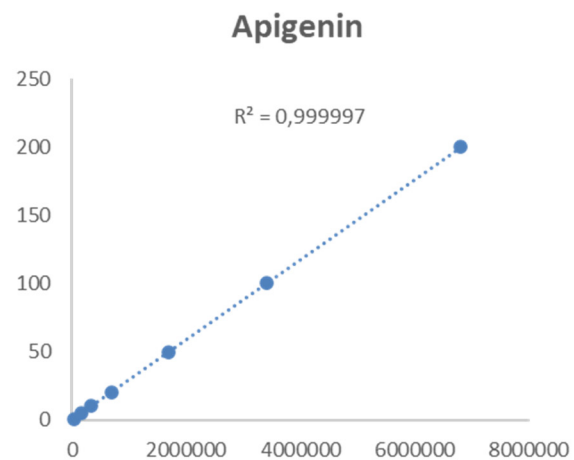

Supplement: s1 [file s1]
